# Supplementary material for: Outcomes of SOT Recipients With COVID-19 in Different Eras of COVID-19 Therapeutics
Source: PubMed Central journal article supplement — Transplant Direct. 2021 Dec 23;8(1):e1268. doi: 10.1097/TXD.0000000000001268 (PMC8710330; doi:10.1097/txd.0000000000001268), 2021-12-23
Supplement: txd-8-e1268-s001.pdf [file txd-8-e1268-s001.pdf]

Supplementary Methods

| outcome                                                                  | exposure                                                                                                                                        | method                                   | model descriptions                                                                                                                                                                                                                                                                                                                                                                                                                                                                                                                                                                                                                                                                             | report                                                                                                                                                          |
|--------------------------------------------------------------------------|-------------------------------------------------------------------------------------------------------------------------------------------------|------------------------------------------|------------------------------------------------------------------------------------------------------------------------------------------------------------------------------------------------------------------------------------------------------------------------------------------------------------------------------------------------------------------------------------------------------------------------------------------------------------------------------------------------------------------------------------------------------------------------------------------------------------------------------------------------------------------------------------------------|-----------------------------------------------------------------------------------------------------------------------------------------------------------------|
| binary                                                                   | Era; inpatient vs outpatient; graft dysfunction; with or without remdesivir; with or without convalescent plasma; with or without dexamethasone | Fischer's Exact                          | n/a                                                                                                                                                                                                                                                                                                                                                                                                                                                                                                                                                                                                                                                                                            | proportion                                                                                                                                                      |
| continuous                                                               | same as above                                                                                                                                   | Wilcoxon rank-sum                        | n/a                                                                                                                                                                                                                                                                                                                                                                                                                                                                                                                                                                                                                                                                                            | median, IQR                                                                                                                                                     |
| WHO severity scale at and during admission (continuous)                  | Era; graft dysfunction; with or without remdesivir; with or without convalescent plasma                                                         | Wilcoxon rank-sum                        | n/a                                                                                                                                                                                                                                                                                                                                                                                                                                                                                                                                                                                                                                                                                            | median, IQR                                                                                                                                                     |
| daily measures of WHO severity scale (longitudinal, ordinal)             | graft dysfunction                                                                                                                               | multilevel ordinal logistic regression   | includes patient-level random intercept, adjusting for severity at admission, interaction between graft dysfunction and days since admission (assuming proportional odds)                                                                                                                                                                                                                                                                                                                                                                                                                                                                                                                      | OR of interaction                                                                                                                                               |
| daily measures of SCr, ALT, AST (if available, longitudinal, continuous) | with or without remdesivir; with or without convalescent plasma; with or without dexamethasone                                                  | mixed effects linear regression          | includes patient-level random intercept, <u>days admitted</u> , a <u>days-since-treatment indicator</u> (0 denotes lab results drawn prior to or on the earliest date drug was administered, 1 or more how long was the data drawn since the earliest date same as the above); the coefficient of this days-since-treatment indicator would reflect the slope of lab values since treatment, aptly defined as interaction between the drug treatment and time. *Of note, the days-since-treatment indicator for lab values drawn from patients who were never treated with the drug would all be 0, and would be 0 for pre-treatment lab values for those who were treated in subsequent days. | mean change of <u>days admitted</u> for untreated; a linear combination of <u>days-since-treatment</u> plus <u>days admitted</u> for treated; p for interaction |
| daily measures proteinuria (if available, longitudinal, binary yes/no)   | with or without remdesivir; with or without convalescent plasma                                                                                 | multilevel logistic regression           | patient-level random intercept, days admitted, days-since-treatment indicator characterized as the above                                                                                                                                                                                                                                                                                                                                                                                                                                                                                                                                                                                       | linear combination of <u>days-since-treatment</u> plus <u>days admitted</u>                                                                                     |
| mortality                                                                | era                                                                                                                                             | Fine and Gray competing-risks regression | unadjusted, with alive at discharge being the competing event, censored otherwise (i.e. still admitted)                                                                                                                                                                                                                                                                                                                                                                                                                                                                                                                                                                                        | sub-hazard ratio                                                                                                                                                |

|                                            |                           |                                                       |                                                                                                               |                     |
|--------------------------------------------|---------------------------|-------------------------------------------------------|---------------------------------------------------------------------------------------------------------------|---------------------|
| length of stay<br>(i.e. discharge<br>rate) | era; graft<br>dysfunction | Fine and<br>Gray<br>competing-<br>risks<br>regression | unadjusted, with death at discharge being the<br>competing event, censored otherwise (i.e. still<br>admitted) | sub-hazard<br>ratio |
|--------------------------------------------|---------------------------|-------------------------------------------------------|---------------------------------------------------------------------------------------------------------------|---------------------|

**Supplementary Figure 1: Trajectories of ALT For SOT Recipients Admitted to the Hospital For COVID-19, Stratified by Remdesivir Use.** S1A: distribution of ALT by time since admission, stratified by use/nonuse of remdesivir. S1B: lowess plot of change over time in ALT for patients who received remdesivir, by days before/after initiation of treatment.

**A**

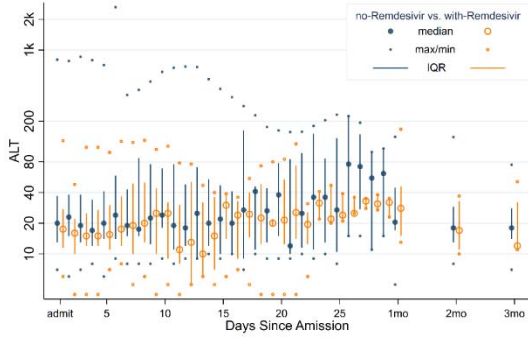

**B**

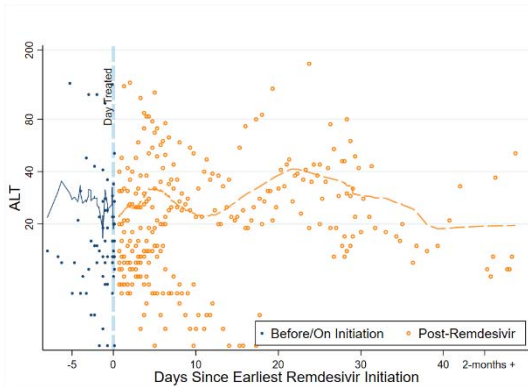

**Supplementary Figure 2: Trajectories of ALT For SOT Recipients Admitted to the Hospital For COVID-19, Stratified by Use of Convalescent Plasma.** S2A: distribution of ALT by time since admission, stratified by use/nonuse of convalescent plasma. S2B: lowess plot of change over time in ALT for patients who received convalescent plasma, by days before/after initiation of treatment.

**A**

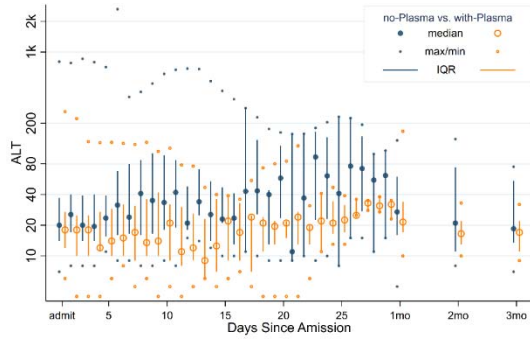

**B**

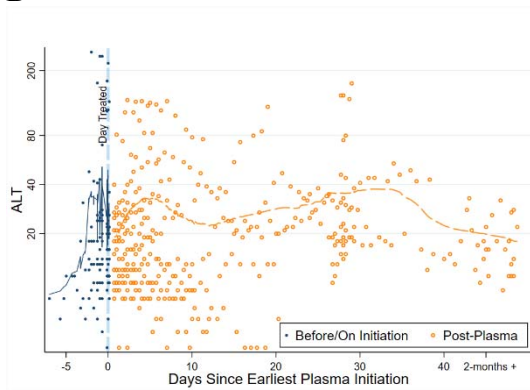

**Supplementary Figure 3: Trajectories of AST For SOT Recipients Admitted to the Hospital For COVID-19, Stratified by Remdesivir Use.** S3A: distribution of AST by time since admission, stratified by use/nonuse of remdesivir. S3B: lowess plot of change over time in AST for patients who received remdesivir, by days before/after initiation of treatment.

**A**

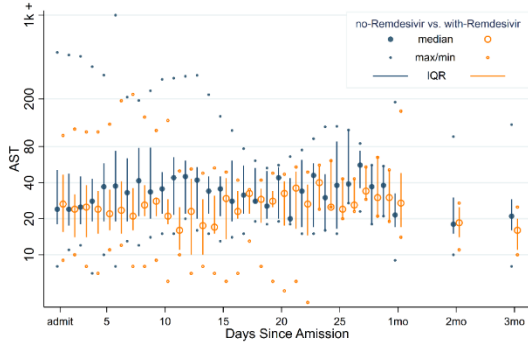

**B**

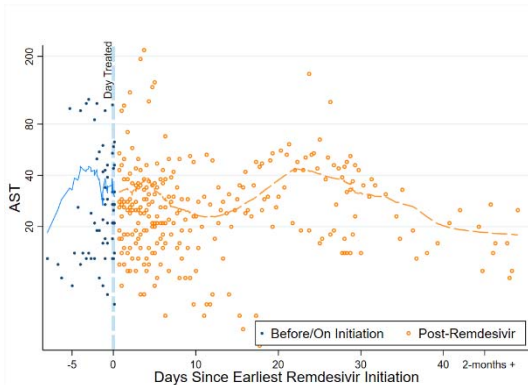

**Supplementary Figure 4: Trajectories of AST For SOT Recipients Admitted to the Hospital For COVID-19, Stratified by Use of Convalescent Plasma.** S4A: distribution of AST by time since admission, stratified by use/nonuse of convalescent plasma. S4B: lowess plot of change over time in AST for patients who received convalescent plasma, by days before/after initiation of treatment.

**A**

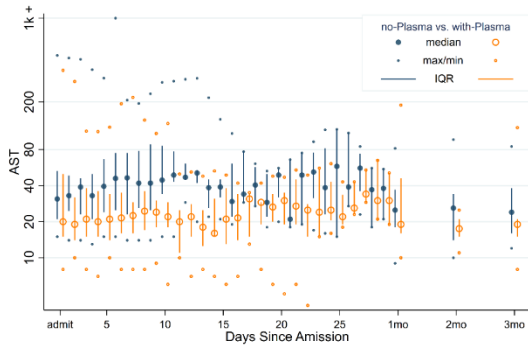

**B**

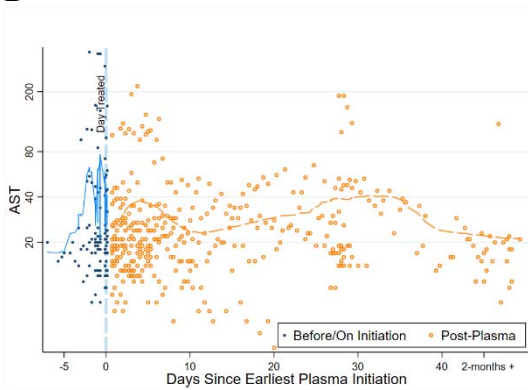

**Supplementary Table 1: Complications, Laboratory Values, and Outcomes in Inpatients Who Received Remdesivir Versus Inpatients Who Did Not.**

|                                                       | did not receive remdesivir | received remdesivir     | p-value          |
|-------------------------------------------------------|----------------------------|-------------------------|------------------|
| n                                                     | 53                         | 24                      |                  |
| <b>highest WHO score achieved</b>                     |                            |                         | <b>&lt;0.001</b> |
| mild, no O2                                           | 29 (54.7%)                 | 0 (0.0%)                |                  |
| mild, mask or nasal                                   | 18 (34.0%)                 | 12 (50.0%)              |                  |
| severe, non-invasive                                  | 3 (5.7%)                   | 4 (16.7%)               |                  |
| severe, intubated or ventilated                       | 1 (1.9%)                   | 3 (12.5%)               |                  |
| ventilated, plus IVP, ECMO or CRRT                    | 1 (1.9%)                   | 2 (8.3%)                |                  |
| death                                                 | 1 (1.9%)                   | 3 (12.5%)               |                  |
| <b>highest WHO score achieved, median (IQR)</b>       | <b>3 (3, 4) (n=53)</b>     | <b>5 (4, 6) (n=24)</b>  | <b>&lt;0.001</b> |
| <b>highest WHO score achieved, mean (SD)</b>          | <b>3.7 (1.0) (n=53)</b>    | <b>5.2 (1.5) (n=24)</b> | <b>&lt;0.001</b> |
| <b>ventilated or intubated</b>                        | <b>3 (5.7%)</b>            | <b>7 (29.2%)</b>        | <b>0.008</b>     |
| CMV PCR result                                        |                            |                         | 0.43             |
| negative                                              | 35 (66.0%)                 | 17 (70.8%)              |                  |
| positive                                              | 4 (7.5%)                   | 4 (16.7%)               |                  |
| n/a                                                   | 14 (26.4%)                 | 3 (12.5%)               |                  |
| beta-D glucan                                         |                            |                         | 0.20             |
| normal                                                | 31 (58.5%)                 | 19 (79.2%)              |                  |
| intermediate                                          | 0 (0.0%)                   | 1 (4.2%)                |                  |
| elevated                                              | 1 (1.9%)                   | 3 (12.5%)               |                  |
| n/a                                                   | 21 (39.6%)                 | 1 (4.2%)                |                  |
| galactomannan category                                |                            |                         | 1.0              |
| negative <0.5                                         | 31 (58.5%)                 | 21 (87.5%)              |                  |
| positive >=0.5                                        | 2 (3.8%)                   | 2 (8.3%)                |                  |
| n/a                                                   | 20 (37.7%)                 | 1 (4.2%)                |                  |
| cryptococcal antigen                                  |                            |                         | 1.0              |
| negative                                              | 23 (43.4%)                 | 14 (58.3%)              |                  |
| positive                                              | 1 (1.9%)                   | 0 (0.0%)                |                  |
| n/a                                                   | 29 (54.7%)                 | 10 (41.7%)              |                  |
| <u>Histoplasma</u> antigen                            |                            |                         | 1.0              |
| 1                                                     | 22 (41.5%)                 | 15 (62.5%)              |                  |
| 2                                                     | 1 (1.9%)                   | 0 (0.0%)                |                  |
| n/a                                                   | 30 (56.6%)                 | 9 (37.5%)               |                  |
| peak CRP, median (IQR)                                | 5 (1, 10) (n=50)           | 7 (3, 10) (n=24)        | 0.24             |
| peak IL-6 (before tocilizumab if given), median (IQR) | 35 (11, 94) (n=40)         | 35 (19, 76) (n=21)      | 0.6              |
| ALT (FU) elevation 2x ULN, new/persistent             | 3 (5.7%)                   | 1 (4.2%)                | 1.0              |
| ALT (FU) elevation 5x ULN, new/persistent             | 0 (0%)                     | 0 (0%)                  | n/a              |
| AST (FU) elevation 2x ULN, new/persistent             | 5 (9.4%)                   | 2 (8.3%)                | 1.0              |
| AST (FU) elevation 5x ULN, new/persistent             | 2 (3.8%)                   | 0 (0.0%)                | 1.0              |
| persistent AKI at follow up (>4wks)                   | 3 (7.0%)                   | 2 (11.8%)               | 0.6              |

|                                                                  |                               |                                 |              |
|------------------------------------------------------------------|-------------------------------|---------------------------------|--------------|
| change of SCr: last and baseline, mean (SD)                      | -0.0 (0.2) (n=43)             | -0.2 (1.4) (n=17)               | 0.51         |
| <b>change of SCr: last and baseline, median (IQR)</b>            | <b>0.1 (-0.1, 0.1) (n=43)</b> | <b>-0.1 (-0.3, -0.0) (n=17)</b> | <b>0.037</b> |
| baseline proteinuria                                             | 13 (29.5%) (n=44)             | 8 (40.0%) (n=20)                | 0.57         |
| PCrR ever higher than 0.2                                        | 16 (30.2%)                    | 10 (41.7%)                      | 0.44         |
| significant increase ( $\geq 0.3$ ) in PCrR between last & first | 3 (8.8%) (n=34)               | 3 (21.4%) (n=14)                | 0.34         |
| acute cellular rejection at 90 days                              | 1 (2.9%)                      | 0 (0.0%)                        | 1.0          |
| antibody mediated rejection at 30 days                           | 1 (1.9%)                      | 0 (0.0%)                        | 1.0          |
| antibody mediated rejection at 60 days                           | 1 (2.7%)                      | 0 (0.0%)                        | 1.0          |
| antibody mediated rejection at 90 days                           | 2 (5.9%)                      | 0 (0.0%)                        | 1.0          |
| graft dysfunction                                                | 17 (32.1%)                    | 8 (33.3%)                       | 1.0          |
| <b>ICU</b>                                                       | <b>7 (13.2%)</b>              | <b>10 (41.7%)</b>               | <b>0.008</b> |
| <b>ARDS</b>                                                      | <b>0 (0.0%)</b>               | <b>3 (12.5%)</b>                | <b>0.028</b> |
| septic shock                                                     | 1 (1.9%)                      | 2 (8.3%)                        | 0.23         |
| acute liver injury                                               | 4 (7.5%)                      | 1 (4.2%)                        | 1.00         |
| myocarditis                                                      | 0 (0.0%)                      | 1 (4.2%)                        | 0.31         |
| encephalopathy                                                   | 0 (0.0%)                      | 1 (4.2%)                        | 0.31         |
| death                                                            | 1 (1.9%)                      | 3 (12.5%)                       | 0.087        |



**Supplementary Table 2: Complications, Laboratory Values, and Outcomes in Inpatients Who Received Convalescent Plasma Versus Inpatients Who Did Not.**

|                                                       | did not receive<br>convalescent plasma | received convalescent<br>plasma | p-value |
|-------------------------------------------------------|----------------------------------------|---------------------------------|---------|
| n                                                     | 33                                     | 44                              |         |
| highest WHO score achieved                            |                                        |                                 | 0.9     |
| mild, no O2                                           | 12 (36.4%)                             | 17 (38.6%)                      |         |
| mild, mask or nasal                                   | 14 (42.4%)                             | 16 (36.4%)                      |         |
| severe, non-invasive                                  | 4 (12.1%)                              | 3 (6.8%)                        |         |
| severe, intubated or ventilated                       | 1 (3.0%)                               | 3 (6.8%)                        |         |
| ventilated, plus IVP, ECMO or CRRT                    | 1 (3.0%)                               | 2 (4.5%)                        |         |
| death                                                 | 1 (3.0%)                               | 3 (6.8%)                        |         |
| highest WHO score achieved, median (IQR)              | 4 (3, 4) (n=33)                        | 4 (3, 5) (n=44)                 | 0.9     |
| highest WHO score achieved, mean (SD)                 | 4.0 (1.2) (n=33)                       | 4.2 (1.5) (n=44)                | 0.53    |
| ventilated or intubated                               | 2 (6.1%)                               | 7 (15.9%)                       | 0.50    |
| CMV result                                            |                                        |                                 | 1.0     |
| negative                                              | 20 (60.6%)                             | 32 (72.7%)                      |         |
| positive                                              | 3 (9.1%)                               | 5 (11.4%)                       |         |
| n/a                                                   | 10 (30.3%)                             | 7 (15.9%)                       |         |
| beta-D glucan                                         |                                        |                                 | 0.8     |
| normal                                                | 21 (63.6%)                             | 29 (65.9%)                      |         |
| intermediate                                          | 0 (0.0%)                               | 1 (2.3%)                        |         |
| elevated                                              | 1 (3.0%)                               | 3 (6.8%)                        |         |
| n/a                                                   | 11 (33.3%)                             | 11 (25.0%)                      |         |
| galactomannan category                                |                                        |                                 | 0.29    |
| negative <0.5                                         | 20 (60.6%)                             | 32 (72.7%)                      |         |
| positive >=0.5                                        | 3 (9.1%)                               | 1 (2.3%)                        |         |
| n/a                                                   | 10 (30.3%)                             | 11 (25.0%)                      |         |
| cryptococcal antigen                                  |                                        |                                 | 0.47    |
| negative                                              | 17 (51.5%)                             | 20 (45.5%)                      |         |
| positive                                              | 1 (3.0%)                               | 0 (0.0%)                        |         |
| n/a                                                   | 15 (45.5%)                             | 24 (54.5%)                      |         |
| <u>Histoplasma</u> antigen                            |                                        |                                 | 0.45    |
| 1                                                     | 16 (48.5%)                             | 21 (47.7%)                      |         |
| 2                                                     | 1 (3.0%)                               | 0 (0.0%)                        |         |
| n/a                                                   | 16 (48.5%)                             | 23 (52.3%)                      |         |
| peak CRP, median (IQR)                                | 7 (2, 11) (n=32)                       | 5 (2, 9) (n=42)                 | 0.6     |
| peak IL-6 (before tocilizumab if given), median (IQR) | 50 (13, 162) (n=27)                    | 27 (12, 65) (n=34)              | 0.099   |
| ALT (FU) elevation 2x ULN, new/persistent             | 0 (0.0%)                               | 4 (9.1%)                        | 0.13    |
| ALT (FU) elevation 5x ULN, new/persistent             | 0 (0%)                                 | 0 (0%)                          | n/a     |
| AST (FU) elevation 2x ULN, new/persistent             | 1 (3.0%)                               | 6 (13.6%)                       | 0.23    |

|                                                                  |                   |                   |      |
|------------------------------------------------------------------|-------------------|-------------------|------|
| AST (FU) elevation 5x ULN, new/persistent                        | 0 (0.0%)          | 2 (4.5%)          | 0.50 |
| persistent AKI at follow up (>4wks)                              | 2 (8.0%)          | 3 (8.6%)          | 1.0  |
| change of SCr: last and baseline, mean (SD)                      | -0.0 (0.2) (n=25) | -0.1 (1.0) (n=35) | 0.9  |
| change of SCr: last and baseline, median (IQR)                   | 0 (-0, 0) (n=25)  | 0 (-0, 0) (n=35)  | 0.7  |
| baseline proteinuria                                             | 11 (42.3%) (n=26) | 10 (26.3%) (n=38) | 0.28 |
| PCrR ever higher than 0.2                                        | 14 (42.4%)        | 12 (27.3%)        | 0.22 |
| significant increase ( $\geq 0.3$ ) in PCrR between last & first | 1 (4.8%) (n=21)   | 5 (18.5%) (n=27)  | 0.21 |
| acute cellular rejection at 90 days                              | 0 (0.0%)          | 1 (5.9%)          | 0.41 |
| antibody mediated rejection at 30 days                           | 0 (0.0%)          | 1 (2.3%)          | 1.0  |
| antibody mediated rejection at 60 days                           | 0 (0.0%)          | 1 (4.8%)          | 0.47 |
| antibody mediated rejection at 90 days                           | 1 (4.2%)          | 1 (5.9%)          | 1.0  |
| graft dysfunction as outcome (regardless of baseline)            | 8 (24.2%)         | 17 (38.6%)        | 0.22 |
| ICU                                                              | 7 (21.2%)         | 10 (22.7%)        | 1.0  |
| complication, ARDS                                               | 0 (0.0%)          | 3 (6.8%)          | 0.26 |
| septic shock                                                     | 1 (3.0%)          | 2 (4.5%)          | 1.0  |
| acute liver injury                                               | 2 (6.1%)          | 3 (6.8%)          | 1.0  |
| myocarditis                                                      | 1 (3.0%)          | 0 (0.0%)          | 0.43 |
| encephalopathy                                                   | 0 (0.0%)          | 1 (2.3%)          | 1.0  |
| death                                                            | 1 (3.0%)          | 3 (6.8%)          | 0.6  |

**Supplementary Table 3: Complications, Laboratory Values, and Outcomes in Inpatients With Or Without Pre-Existing Graft Dysfunction Prior To Admission.**

|                                                       | without graft dysfunction | with pre-existing graft dysfunction | p-value      |
|-------------------------------------------------------|---------------------------|-------------------------------------|--------------|
| n                                                     | 40                        | 37                                  |              |
| highest WHO score achieved                            |                           |                                     | 0.12         |
| mild, no O2                                           | 17 (42.5%)                | 12 (32.4%)                          |              |
| mild, mask or nasal                                   | 18 (45.0%)                | 12 (32.4%)                          |              |
| severe, non-invasive                                  | 2 (5.0%)                  | 5 (13.5%)                           |              |
| severe, intubated or ventilated                       | 1 (2.5%)                  | 3 (8.1%)                            |              |
| ventilated, plus IVP, ECMO or CRRT                    | 2 (5.0%)                  | 1 (2.7%)                            |              |
| death                                                 | 0 (0.0%)                  | 4 (10.8%)                           |              |
| highest WHO score achieved, median (IQR)              | 4 (3, 4) (n=40)           | 4 (3, 5) (n=37)                     | 0.073        |
| <b>highest WHO score achieved, mean (SD)</b>          | <b>3.8 (1.0) (n=40)</b>   | <b>4.5 (1.6) (n=37)</b>             | <b>0.033</b> |
| ever ventilated                                       | 3 (7.5%)                  | 7 (18.9%)                           | 0.18         |
| CMV PCR                                               |                           |                                     | 1.0          |
| negative                                              | 27 (67.5%)                | 24 (67.6%)                          |              |
| positive                                              | 4 (10.0%)                 | 4 (10.8%)                           |              |
| n/a                                                   | 9 (22.5%)                 | 8 (21.6%)                           |              |
| beta-D glucan                                         |                           |                                     | 0.22         |
| normal                                                | 27 (67.5%)                | 23 (62.2%)                          |              |
| intermediate                                          | 0 (0.0%)                  | 1 (2.7%)                            |              |
| elevated                                              | 1 (2.5%)                  | 3 (8.1%)                            |              |
| n/a                                                   | 12 (30.0%)                | 10 (27.0%)                          |              |
| galactomannan category                                |                           |                                     | 0.11         |
| negative <0.5                                         | 28 (70.0%)                | 24 (64.9%)                          |              |
| positive >=0.5                                        | 0 (0.0%)                  | 4 (10.8%)                           |              |
| n/a                                                   | 12 (30.0%)                | 9 (24.3%)                           |              |
| cryptococcal antigen                                  |                           |                                     | 1.0          |
| negative                                              | 19 (47.5%)                | 18 (48.6%)                          |              |
| positive                                              | 0 (0.0%)                  | 0 (0.0%)                            |              |
| n/a                                                   | 21 (52.5%)                | 19 (51.4%)                          |              |
| <u>Histoplasma</u> antigen                            |                           |                                     | 1.0          |
| negative                                              | 19 (47.5%)                | 18 (48.6%)                          |              |
| positive                                              | 0 (0.0%)                  | 1 (2.7%)                            |              |
| n/a                                                   | 21 (52.5%)                | 18 (48.6%)                          |              |
| peak CRP, median (IQR)                                | 6 (3, 10) (n=37)          | 5 (2, 10) (n=37)                    | 0.7          |
| peak IL-6 (before tocilizumab if given), median (IQR) | 36 (16, 96) (n=30)        | 33 (10, 78) (n=31)                  | 0.7          |
| ALT (FU) elevation 2x ULN, new/persistent             | 1 (2.5%)                  | 3 (8.1%)                            | 0.35         |
| ALT (FU) elevation 5x ULN, new/persistent             | 0 (0%)                    | 0 (0%)                              | n/a          |
| AST (FU) elevation 2x ULN, new/persistent             | 2 (5.0%)                  | 5 (13.5%)                           | 0.25         |
| AST (FU) elevation 5x ULN, new/persistent             | 0 (0.0%)                  | 2 (5.4%)                            | 0.23         |

|                                                                                      |                        |                         |                  |
|--------------------------------------------------------------------------------------|------------------------|-------------------------|------------------|
| persistent AKI at follow up (>4wks)                                                  | 2 (5.9%)               | 3 (11.5%)               | 0.6              |
| change of SCr: last and baseline, mean (SD)                                          | -0.1 (0.7) (n=34)      | 0.1 (0.8) (n=26)        | 0.34             |
| change of SCr: last and baseline, median (IQR)                                       | 0.0 (-0.2, 0.1) (n=34) | -0.0 (-0.3, 0.1) (n=26) | 0.8              |
| baseline proteinuria                                                                 | 9 (25.0%) (n=36)       | 12 (42.9%) (n=28)       | 0.18             |
| PCrR ever higher than 0.2                                                            | 10 (25.0%) (n=40)      | 16 (43.2%) (n=37)       | 0.1              |
| <b>significant increase (<math>\geq 0.3</math>) in PCrR between last &amp; first</b> | <b>0 (0.0%) (n=23)</b> | <b>6 (24.0%) (n=25)</b> | <b>0.023</b>     |
| acute cellular rejection at 90 days                                                  | 0 (0.0%)               | 1 (2.8%) (n=36)         | 0.47             |
| antibody mediated rejection at 30 days                                               | 0 (0.0%)               | 1 (2.7%) (n=37)         | 0.48             |
| antibody mediated rejection at 60 days                                               | 0 (0.0%)               | 1 (2.8%) (n=36)         | 0.47             |
| antibody mediated rejection at 90 days                                               | 0 (0.0%)               | 2 (5.6%) (n=36)         | 0.22             |
| <b>graft dysfunction</b>                                                             | <b>1 (2.5%)</b>        | <b>24 (64.9%)</b>       | <b>&lt;0.001</b> |
| <b>ICU</b>                                                                           | <b>4 (10.0%)</b>       | <b>13 (35.1%)</b>       | <b>0.012</b>     |
| complication, ARDS                                                                   | 1 (2.5%)               | 2 (5.4%)                | 0.6              |
| septic shock                                                                         | 1 (2.5%)               | 2 (5.4%)                | 0.6              |
| acute liver injury                                                                   | 4 (10.0%)              | 1 (2.7%)                | 0.36             |
| myocarditis                                                                          | 0 (0.0%)               | 1 (2.7%)                | 0.48             |
| encephalopathy                                                                       | 0 (0.0%)               | 1 (2.7%)                | 0.48             |
| <b>death</b>                                                                         | <b>0 (0.0%)</b>        | <b>5 (13.5%)</b>        | <b>0.022</b>     |

**Supplementary Table 4: Infections at 0 – 7 Days, 8 – 30 Days, 31 - 60 Days, 61 - 90 Days After Inpatient Admission**

|                                          | Era 1 (3/1 – 5/31) | Era 2 (6/1 – 11/30) | p-value |
|------------------------------------------|--------------------|---------------------|---------|
| n                                        | 21                 | 56                  |         |
| co-infection, Days 0 – 7 after admission | 4 (19.0%)          | 18 (32.1%)          | 0.40    |
| bacterial                                | 4 (19.0%)          | 11 (19.6%)          |         |
| viral                                    | 0 (0.0%)           | 7 (12.5%)           |         |
| fungal                                   | 1 (4.8%)           | 5 (8.9%)            |         |

| infection type, Days 0 – 7 after admission |          |           |
|--------------------------------------------|----------|-----------|
| bloodstream infection                      | 0 (0.0%) | 1 (1.8%)  |
| Clostridium difficile diarrhea             | 0 (0.0%) | 1 (1.8%)  |
| CMV viremia                                | 0 (0.0%) | 3 (5.4%)  |
| CNS infection                              | 0 (0.0%) | 0 (0.0%)  |
| EBV viremia                                | 0 (0.0%) | 3 (5.4%)  |
| intra-abdominal abscess                    | 0 (0.0%) | 1 (1.8%)  |
| invasive fungal infection                  | 1 (4.8%) | 4 (7.1%)  |
| osteomyelitis                              | 0 (0.0%) | 1 (1.8%)  |
| respiratory/lung                           | 2 (9.5%) | 6 (10.7%) |
| skin/soft tissue infection                 | 1 (4.8%) | 0 (0.0%)  |
| UTI                                        | 2 (9.5%) | 4 (7.1%)  |
| Zoster                                     | 0 (0.0%) | 1 (1.8%)  |

|                                         | Era 1 (3/1 – 5/31) | Era 2 (6/1 – 11/30) | p-value |
|-----------------------------------------|--------------------|---------------------|---------|
| n                                       | 21                 | 56                  |         |
| infections, Days 8 – 30 after admission | 0 (0.0%)           | 8 (14.3%)           | 0.10    |
| bacterial                               | 0 (0.0%)           | 6 (10.7%)           |         |
| viral                                   | 0 (0.0%)           | 2 (3.6%)            |         |
| fungal                                  | 0 (0.0%)           | 1 (1.8%)            |         |

| infection type, Days 8 – 30 after admission |          |          |
|---------------------------------------------|----------|----------|
| bloodstream infection                       | 0 (0.0%) | 1 (1.8%) |
| Clostridium difficile diarrhea              | 0 (0.0%) | 0 (0.0%) |
| CMV viremia                                 | 0 (0.0%) | 2 (3.6%) |
| CNS infection                               | 0 (0.0%) | 1 (1.8%) |
| EBV viremia                                 | 0 (0.0%) | 0 (0.0%) |
| intra-abdominal abscess                     | 0 (0.0%) | 0 (0.0%) |
| invasive fungal infection                   | 0 (0.0%) | 1 (1.8%) |
| osteomyelitis                               | 0 (0.0%) | 0 (0.0%) |
| respiratory                                 | 0 (0.0%) | 3 (5.4%) |
| UTI                                         | 0 (0.0%) | 3 (5.4%) |
| Zoster                                      | 0 (0.0%) | 0 (0.0%) |

|                                          | Era 1 (3/1/20 – 5/31/20) | Era 2 (6/1/20 – 11/30/20) | p-value |
|------------------------------------------|--------------------------|---------------------------|---------|
| n                                        | 21                       | 56                        |         |
| infections, Days 31 – 60 after admission | 0 (0.0%)                 | 3 (5.5%)                  | 0.56    |
| bacterial                                | 0 (0.0%)                 | 1 (1.8%) (n=55)           |         |
| viral                                    | 0 (0.0%)                 | 2 (5.5%) (n=55)           |         |
| fungal                                   | 0 (0.0%)                 | 0 (0.0%) (n=55)           |         |

| infection type, Days 31 – 60 after admission |          |          |
|----------------------------------------------|----------|----------|
| bloodstream infection                        | 0 (0.0%) | 0 (0.0%) |
| Clostridium difficile diarrhea               | 0 (0.0%) | 0 (0.0%) |
| CMV viremia                                  | 0 (0.0%) | 2 (5.5%) |
| CNS Infection                                | 0 (0.0%) | 0 (0.0%) |
| EBV viremia                                  | 0 (0.0%) | 0 (0.0%) |
| intra-abdominal abscess                      | 0 (0.0%) | 0 (0.0%) |
| invasive fungal infection                    | 0 (0.0%) | 0 (0.0%) |
| osteomyelitis                                | 0 (0.0%) | 0 (0.0%) |
| respiratory                                  | 0 (0.0%) | 0 (0.0%) |
| skin/soft tissue infection                   | 0 (0.0%) | 0 (0.0%) |
| UTI                                          | 0 (0.0%) | 1 (1.8%) |
| Zoster                                       | 0 (0.0%) | 0 (0.0%) |

|                                          | Era 1 (3/1/20 – 5/31/20) | Era 2 (6/1 – 11/30/20) | p-value |
|------------------------------------------|--------------------------|------------------------|---------|
| n                                        | 21                       | 56                     |         |
| infections, Days 61 – 90 after admission | 1 (4.8%)                 | 1 (1.8%) (n=55)        | 0.48    |
| bacterial                                | 1 (4.8%)                 | 1 (1.8%) (n=55)        |         |
| viral                                    | 0 (0.0%)                 | 0 (0.0%) (n=55)        |         |
| fungal                                   | 0 (0.0%)                 | 1 (1.8%) (n=55)        |         |

| infection type, Days 61 – 90 after admission |          |          |
|----------------------------------------------|----------|----------|
| bloodstream infection                        | 0 (0.0%) | 0 (0.0%) |
| Clostridium difficile diarrhea               | 0 (0.0%) | 0 (0.0%) |
| CMV viremia                                  | 0 (0.0%) | 0 (0.0%) |
| CNS infection                                | 0 (0.0%) | 0 (0.0%) |
| EBV viremia                                  | 0 (0.0%) | 0 (0.0%) |
| intra-abdominal abscess                      | 0 (0.0%) | 0 (0.0%) |
| invasive fungal infection                    | 0 (0.0%) | 1 (1.8%) |
| osteomyelitis                                | 0 (0.0%) | 0 (0.0%) |
| respiratory                                  | 0 (0.0%) | 1 (1.8%) |
| skin/soft tissue infection                   | 0 (0.0%) | 0 (0.0%) |
| UTI                                          | 1 (4.8%) | 0 (0.0%) |
| Zoster                                       | 0 (0.0%) | 0 (0.0%) |
